# Supplementary material
Source: PubMed Central journal article supplement (PMC8316093)

**Supplementary material and methods S1.** replicon sequences used for plasmid detection.

>blaKPC-2\_1AY034847

ATGTCACTGTATCGCCGCTAGTTCTGCTGTCTTGTCTCTCATGGCCGCTGGCTGGCTTTTCTGCCACCGCGCTGACCAACCTCGTCGCGGAACCATTCGCT  
AAACTCGAACAGGACTTTGGCGGCTCCATCGGTGTGTACGCGATGGATACCGGCTCAGGCGCAACTGTAAGTTACCGCGCTGAGGAGCGCTTCCCACTGT  
GCAGCTCATTCAAGGGCTTTCTTGCTGCCGCTGTGCTGGCTCGCAGCCAGCAGCAGGCCGGCTTGCTGGACACACCCATCCGTTACGGCAAAAATGCGCT  
GGTCCGTGGTCACCCATCTCGGAAAAATATCTGACAACAGGCATGACGGTGGCGGAGCTGTCCGCGGCCCGCTGCAATACAGTGATAACGCCGCCGC  
CAATTTGTTGCTGAAGGAGTTGGCGGCCCGGCCGGCTGACGGCCTTCATGCGCTCTATCGGCGATACCACGTTCCGTCTGGACCGCTGGGAGCTGGA  
GCTGAACTCCGCCATCCAGGCGATGCGCGGATACTCATCGCCGCGCGCTGACGGAAGCTTACAAAACTGACTGTTGGCTCTGCACTGGCTGCG  
CCGCGCGGCAGCAGTTTGTGATTGGCTAAAGGGAAACACGACCGGCAACCACCGCATCCGCGCGCGGTGCCGCGAGCTGGGCGAGTGGGAGACAA  
AACCGGAACCTGCGGAGTGTATGGCACGGCAAATGACTATGCCGTCTGCCCCACTGGGCGCGCACCTATTGTGTTGGCCGTCTACACCCGGGCGCCT  
AACCAAGGATGACAAGCACAGCGAGGCCGTATCGCCGCTGCGGCTAGACTCGCGCTCGAGGGATTGGCGTCAACGGGCGAGTAA

>IncFII(pKP91)\_1\_\_CP000966

TTTTGGTGTGCCACGCCGTAAGGTGGCAGGGAGCTGGTTTTGTGGATGTTTACCCGGAACCAGAAAGCAAAAACCCCGATAATCTTCTCAATCTTGGCG  
GACAGAAAAGATTAACGGGGCTTCATAAACTGCATAGAACGTGTTGCTCTATGCAGGGAGTATAGAATTATGCCAGAAAAGTTCAAGACCTTCTGTGC  
TCACTCCTCCGTGCAACATAAGCGCAGGA

>IncFIB(pQil)\_1\_\_JN233705

GAAGGTTATACAGACATCCGTATTACCGGCCACGACTTTCGATGGAGACTGACTTCAAGGTGTGGTTGGCATATTCTCGGTTTTCGAAATATGGCTT  
AAACAGCAGCACCATTGAACCTCCATTAGCGAGTTTGTCTACATCTGCGGGTTAGCTCAAAGGACAAAGATAAAGGACTCAGAACGCGCTTGGCCGAC  
TCTCTATTCTGCTTCGCAGCACAACTATCAAGCTTGCCTCAGAAAAGGATCGGAATGGTGTGATCTGGTCTGTTAAGTCGTGGTAAGTGGGACGAAAA  
AGACGACATCATGGAACCTACCGCCGATGAGTCTTTGGGAGCTTTATCAATTCGACCGTCAGGTGCTTCTGCAGATGTTTATAATCCGGCAACTTGCGA  
ACAAAGGGACAGCACAGGCCCTATACACTTTCATTGAGAGCCTTCTGAGCGACCAATACCACTATCGTTTCGCGCGTATTAACGTCGCTAATGCTTACC  
TCACCAATAACCAGCAGAATCGAGTGATTAACAAGGCTATAGACGAGCTTAAAGCGGTCGGTTATTTAGATGGCGATGTCGTTAAAAAGGATGGTGAAT  
GGCACTTAATCATAACCCGTCGCACGCTAGGCCAGACATTAAGGCTATGTCTGAAGCCTTAAAAGATGGAGAGTAAAAGCGCCTGACTGTGTTGTAA  
GCGGATATGTGCCGAGTACTGCGAGTGTGCTG

**Supplementary Figure S1.** ProgressiveMAUVE alignment of all plasmids included in this study. Similar sequence regions are represented as blocks of identical colors, the percentage of sequence similarity is represented by the density of the color in each block (white: unsimilar sequences in at least one of the plasmids included; fully colored: identical sequence in all plasmids).

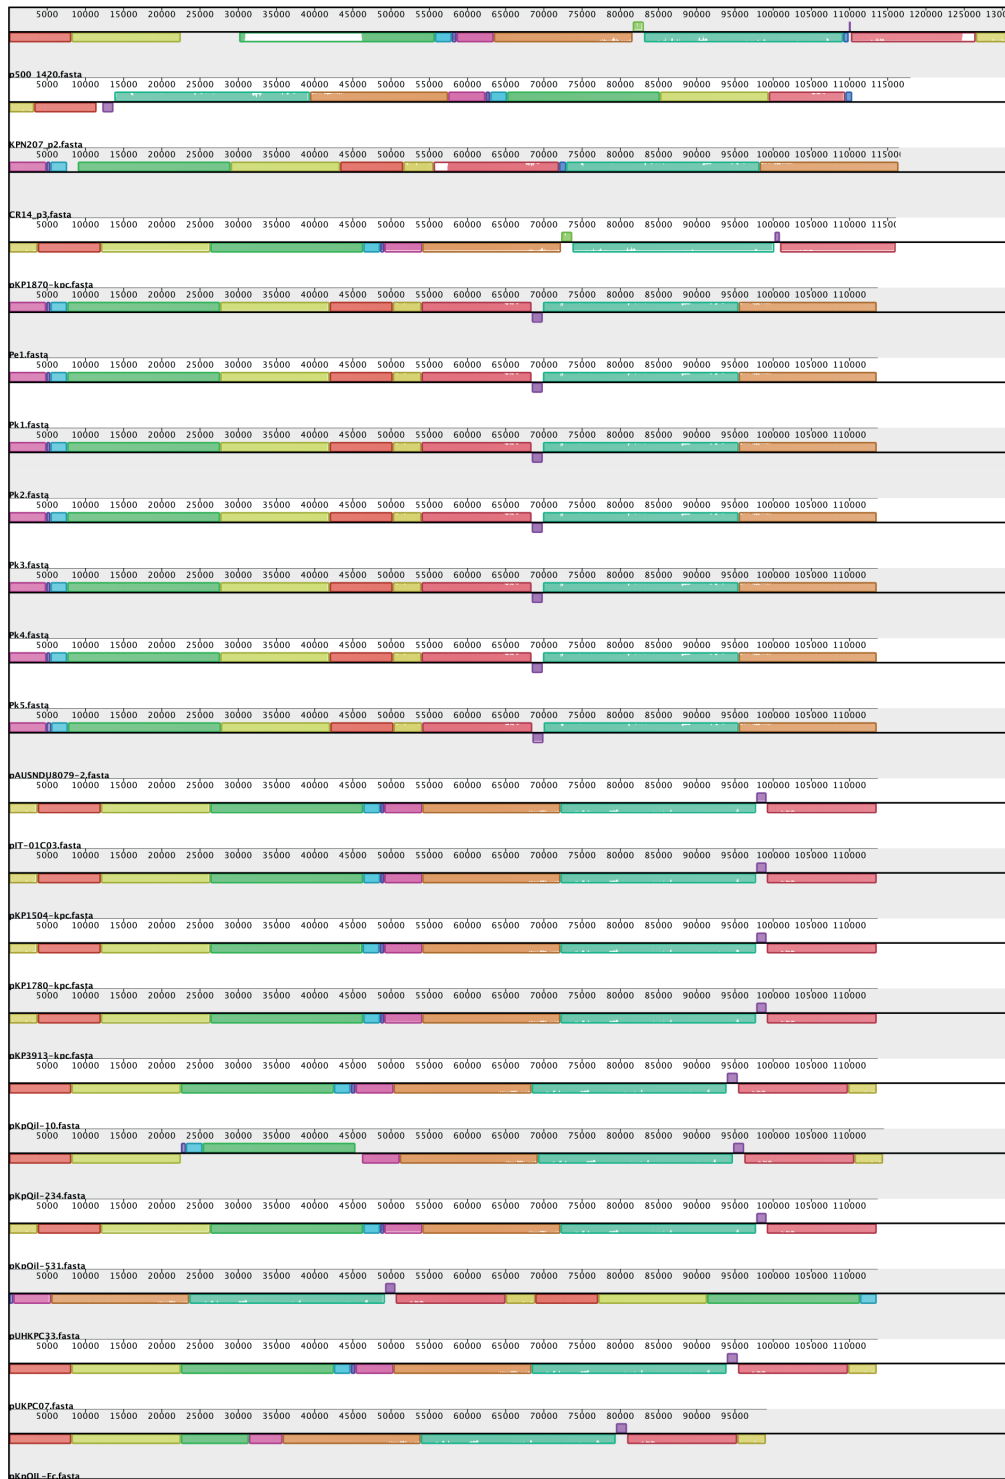

Supplement: aac.00147-21-s0005.pdf [file aac.00147-21-s0005.pdf]
